# Supplementary material for: Population Structure and Genetic Diversity Within the Endangered Species Pityopsis ruthii (Asteraceae)
Source: Front Plant Sci. 2018 Jul 11;9:943. doi: 10.3389/fpls.2018.00943 (PMC6050971; doi:10.3389/fpls.2018.00943)
Supplement: TABLE S1 — Summary statistics for 12 nuclear microsatellite loci in Pityopsis ruthii populations. [file Table_1.DOCX]

| **Table S1.** Summary statistics for 12 nuclear microsatellite loci in *Pityopsis ruthii* populations. | | | | | | | | | |
| --- | --- | --- | --- | --- | --- | --- | --- | --- | --- |
| Locus | Repeat motif | *A* | *A*R | *H*O | *H*E | *F*IS | *F*IT | *F*ST | *N*m |
| PR002 | (TG)9 | 15 | 1.68 | 0.50 | 0.52 | 0.02 | 0.25 | 0.24 | 0.78 |
| PR003 | (TG)14 | 9 | 1.78 | 0.42 | 0.59 | 0.26 | 0.46 | 0.27 | 0.69 |
| PR005 | (CT)7 | 16 | 1.85 | 0.76 | 0.63 | -0.23 | 0.11 | 0.27 | 0.66 |
| PR006 | (CA)16 | 17 | 1.81 | 0.33 | 0.67 | 0.48 | 0.59 | 0.21 | 0.94 |
| PR009 | (GT)11 | 16 | 1.80 | 0.43 | 0.62 | 0.27 | 0.53 | 0.36 | 0.45 |
| PR020 | (GT)8 | 13 | 1.79 | 0.48 | 0.68 | 0.26 | 0.39 | 0.18 | 1.16 |
| PR027 | (GTGTC)5 | 18 | 1.78 | 0.50 | 0.62 | 0.17 | 0.35 | 0.23 | 0.86 |
| PR028 | (GT)10 | 9 | 1.69 | 0.28 | 0.54 | 0.45 | 0.59 | 0.26 | 0.70 |
| PR029 | (GT)3A(GT)8 | 24 | 1.89 | 0.66 | 0.77 | 0.10 | 0.26 | 0.17 | 1.24 |
| PR030 | (AC)12 | 21 | 1.89 | 0.53 | 0.77 | 0.28 | 0.41 | 0.18 | 1.15 |
| PR031 | (GT)9AA(GT)5 | 19 | 1.82 | 0.25 | 0.57 | 0.54 | 0.70 | 0.35 | 0.47 |
| PR035 | (GT)5A(TG)7(AG)15 | 16 | 1.84 | 0.71 | 0.76 | 0.04 | 0.16 | 0.12 | 1.76 |
| Mean |  | 16 | 1.80 | 0.49 | 0.65 | 0.22 | 0.40 | 0.24 | 0.90 |
| *A=* number of alleles, *A*R= allelic richness, *H*O= observed heterozygosity, *H*E= expected heterozygosity, *F*IS= inbreeding coefficient relative to the subpopulation, *F*IT= inbreeding coefficient relative to total number of individuals, *F*ST= fixation index, *N*m= estimated gene flow | | | | | | | | | |
